# Supplementary material
Source: publisher site journal article supplement (https://www.dovepress.com/article/supplementary_file/624052/624052%20Supplementary%20Material.docx)
Supplement: Supplementary file 1 [file 624052%20Supplementary%20Material.docx]

**Supplementary Material**

*Metabolic Dysfunction Outweighs Inflammatory Burden in Association with Hyperuricemia: A Cross-Sectional Study in a Large Health Examination Cohort*

# Supplementary Tables

**Supplementary Table S1. Comparison of participants included in and excluded from the TyG analysis**

| Variable | Included in TyG analysis (n = 4,193) | Excluded from TyG analysis (n = 4,240) | P value |
| --- | --- | --- | --- |
| Age, years | 47.05 ± 14.60 | 58.76 ± 15.87 | <0.001 |
| Male, n (%) | 2369 (56.5%) | 2393 (56.4%) | 0.973 |
| Uric acid, µmol/L | 339.07 ± 84.84 | 334.53 ± 79.09 | 0.011 |
| Hyperuricemia, n (%) | 781 (18.6%) | 710 (16.7%) | 0.025 |
| NHR | 41.02 ± 11.45 | 42.05 ± 12.75 | <0.001 |
| Neutrophil proportion, % | 54.28 ± 8.01 | 54.81 ± 8.39 | 0.003 |
| HDL cholesterol, mmol/L | 1.39 ± 0.32 | 1.38 ± 0.33 | 0.168 |
| Alanine aminotransferase, U/L | 23.90 ± 18.63 | 22.95 ± 16.94 | 0.014 |
| Aspartate aminotransferase, U/L | 22.70 ± 8.94 | 23.35 ± 9.11 | 0.001 |
| Creatinine, µmol/L | 71.05 ± 15.30 | 70.92 ± 17.35 | 0.712 |
| Blood urea nitrogen, mmol/L | 5.10 ± 1.27 | 5.64 ± 1.58 | <0.001 |
| White blood cell count, ×10⁹/L | 6.13 ± 1.55 | 6.18 ± 1.61 | 0.144 |
| Hemoglobin, g/L | 144.81 ± 14.88 | 144.97 ± 14.86 | 0.617 |
| Platelet count, ×10⁹/L | 246.81 ± 59.23 | 236.37 ± 59.54 | <0.001 |
| Total cholesterol, mmol/L | 5.07 ± 0.99 | 5.13 ± 1.13 | 0.008 |
| HbA1c, % | 5.74 ± 0.35 | 6.27 ± 1.03 | <0.001 |
| LDL cholesterol, mmol/L | 3.17 ± 0.74 | 3.15 ± 0.90 | 0.560 |

**Supplementary Table S2. Sex- and age-stratified associations of NHR and TyG with hyperuricemia**

| Exposure | Stratifier | Group | n | HUA cases | OR (95% CI) | P value | P for interaction |
| --- | --- | --- | --- | --- | --- | --- | --- |
| NHR, per 1-SD | Sex | Male | 4517 | 980 | 1.11 (1.03-1.20) | 0.008 | <0.001 |
| NHR, per 1-SD | Sex | Female | 3442 | 418 | 1.40 (1.22-1.60) | <0.001 | <0.001 |
| NHR, per 1-SD | Age | <60 years | 4299 | 820 | 1.17 (1.06-1.29) | 0.001 | 0.002 |
| NHR, per 1-SD | Age | ≥60 years | 3660 | 578 | 1.15 (1.05-1.27) | 0.004 | 0.002 |
| TyG, per 1-SD | Sex | Male | 2369 | 616 | 1.49 (1.34-1.66) | <0.001 | <0.001 |
| TyG, per 1-SD | Sex | Female | 1824 | 165 | 2.04 (1.66-2.52) | <0.001 | <0.001 |
| TyG, per 1-SD | Age | <60 years | 3138 | 611 | 1.53 (1.37-1.71) | <0.001 | 0.230 |
| TyG, per 1-SD | Age | ≥60 years | 1055 | 170 | 1.93 (1.58-2.36) | <0.001 | 0.230 |

**Supplementary Table S3. Sensitivity analysis using eGFR category**

| **Exposure** | **Sensitivity model with eGFR category OR (95% CI)** | **P value** |
| --- | --- | --- |
| NHR, per 1-SD | 1.16 (1.08-1.23) | <0.001 |
| TyG, per 1-SD | 1.59 (1.45-1.75) | <0.001 |

# Supplementary Figures

**Supplementary Figure S1. Sex-stratified restricted cubic spline analysis of the association between NHR and hyperuricemia.**


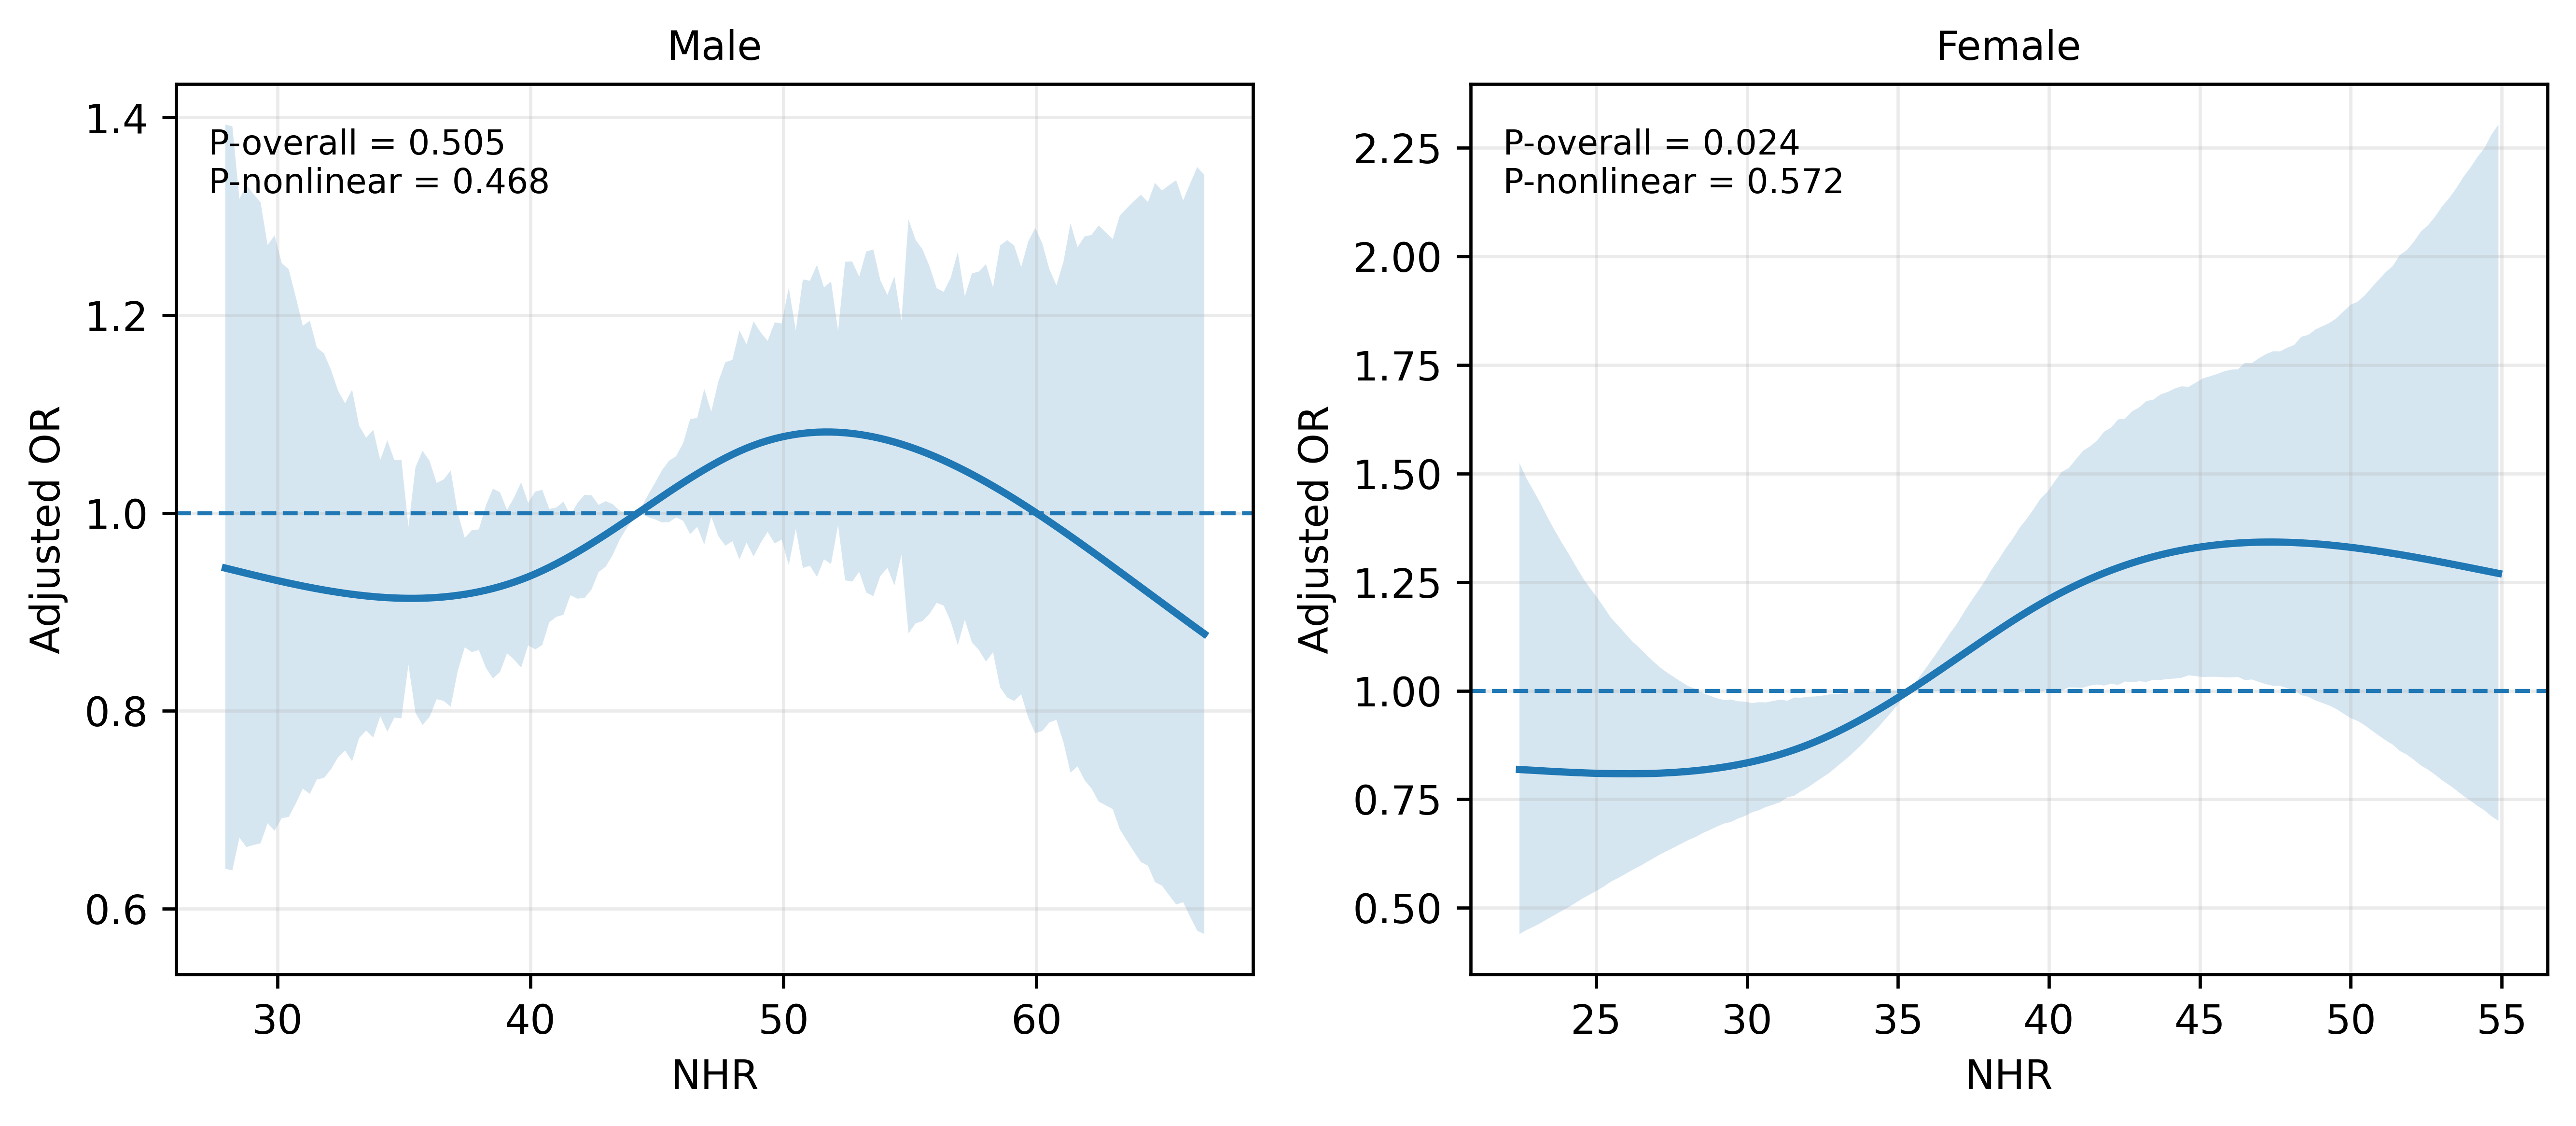


**Supplementary Figure S2. Sex-stratified restricted cubic spline analysis of the association between TyG index and hyperuricemia.**


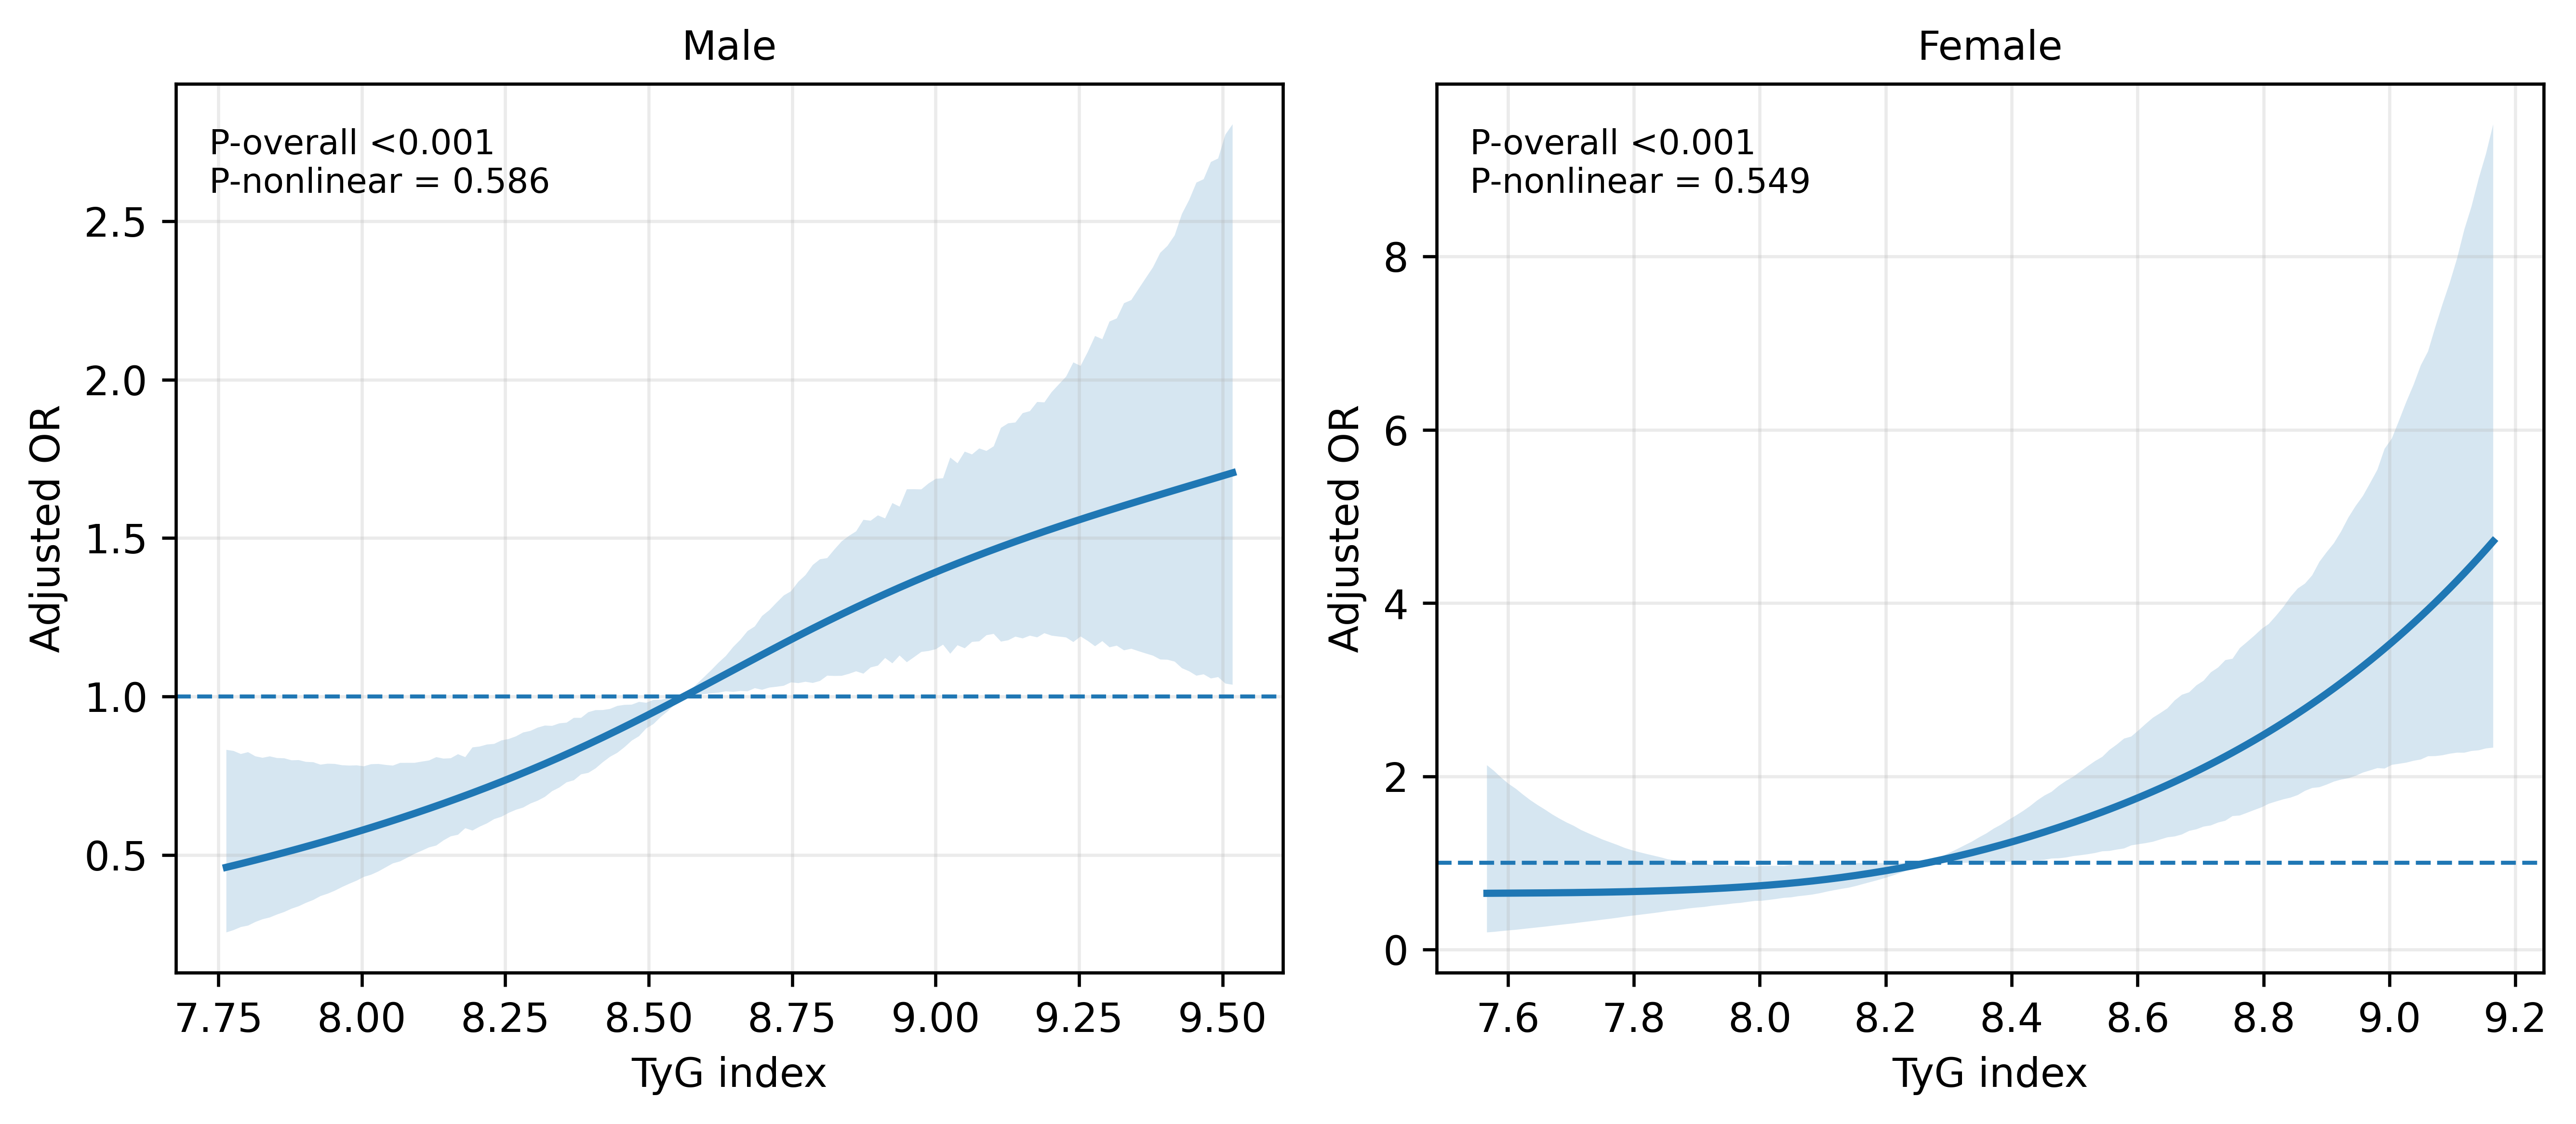


**Supplementary Figure S3. Age-stratified restricted cubic spline analysis of the association between NHR and hyperuricemia.**


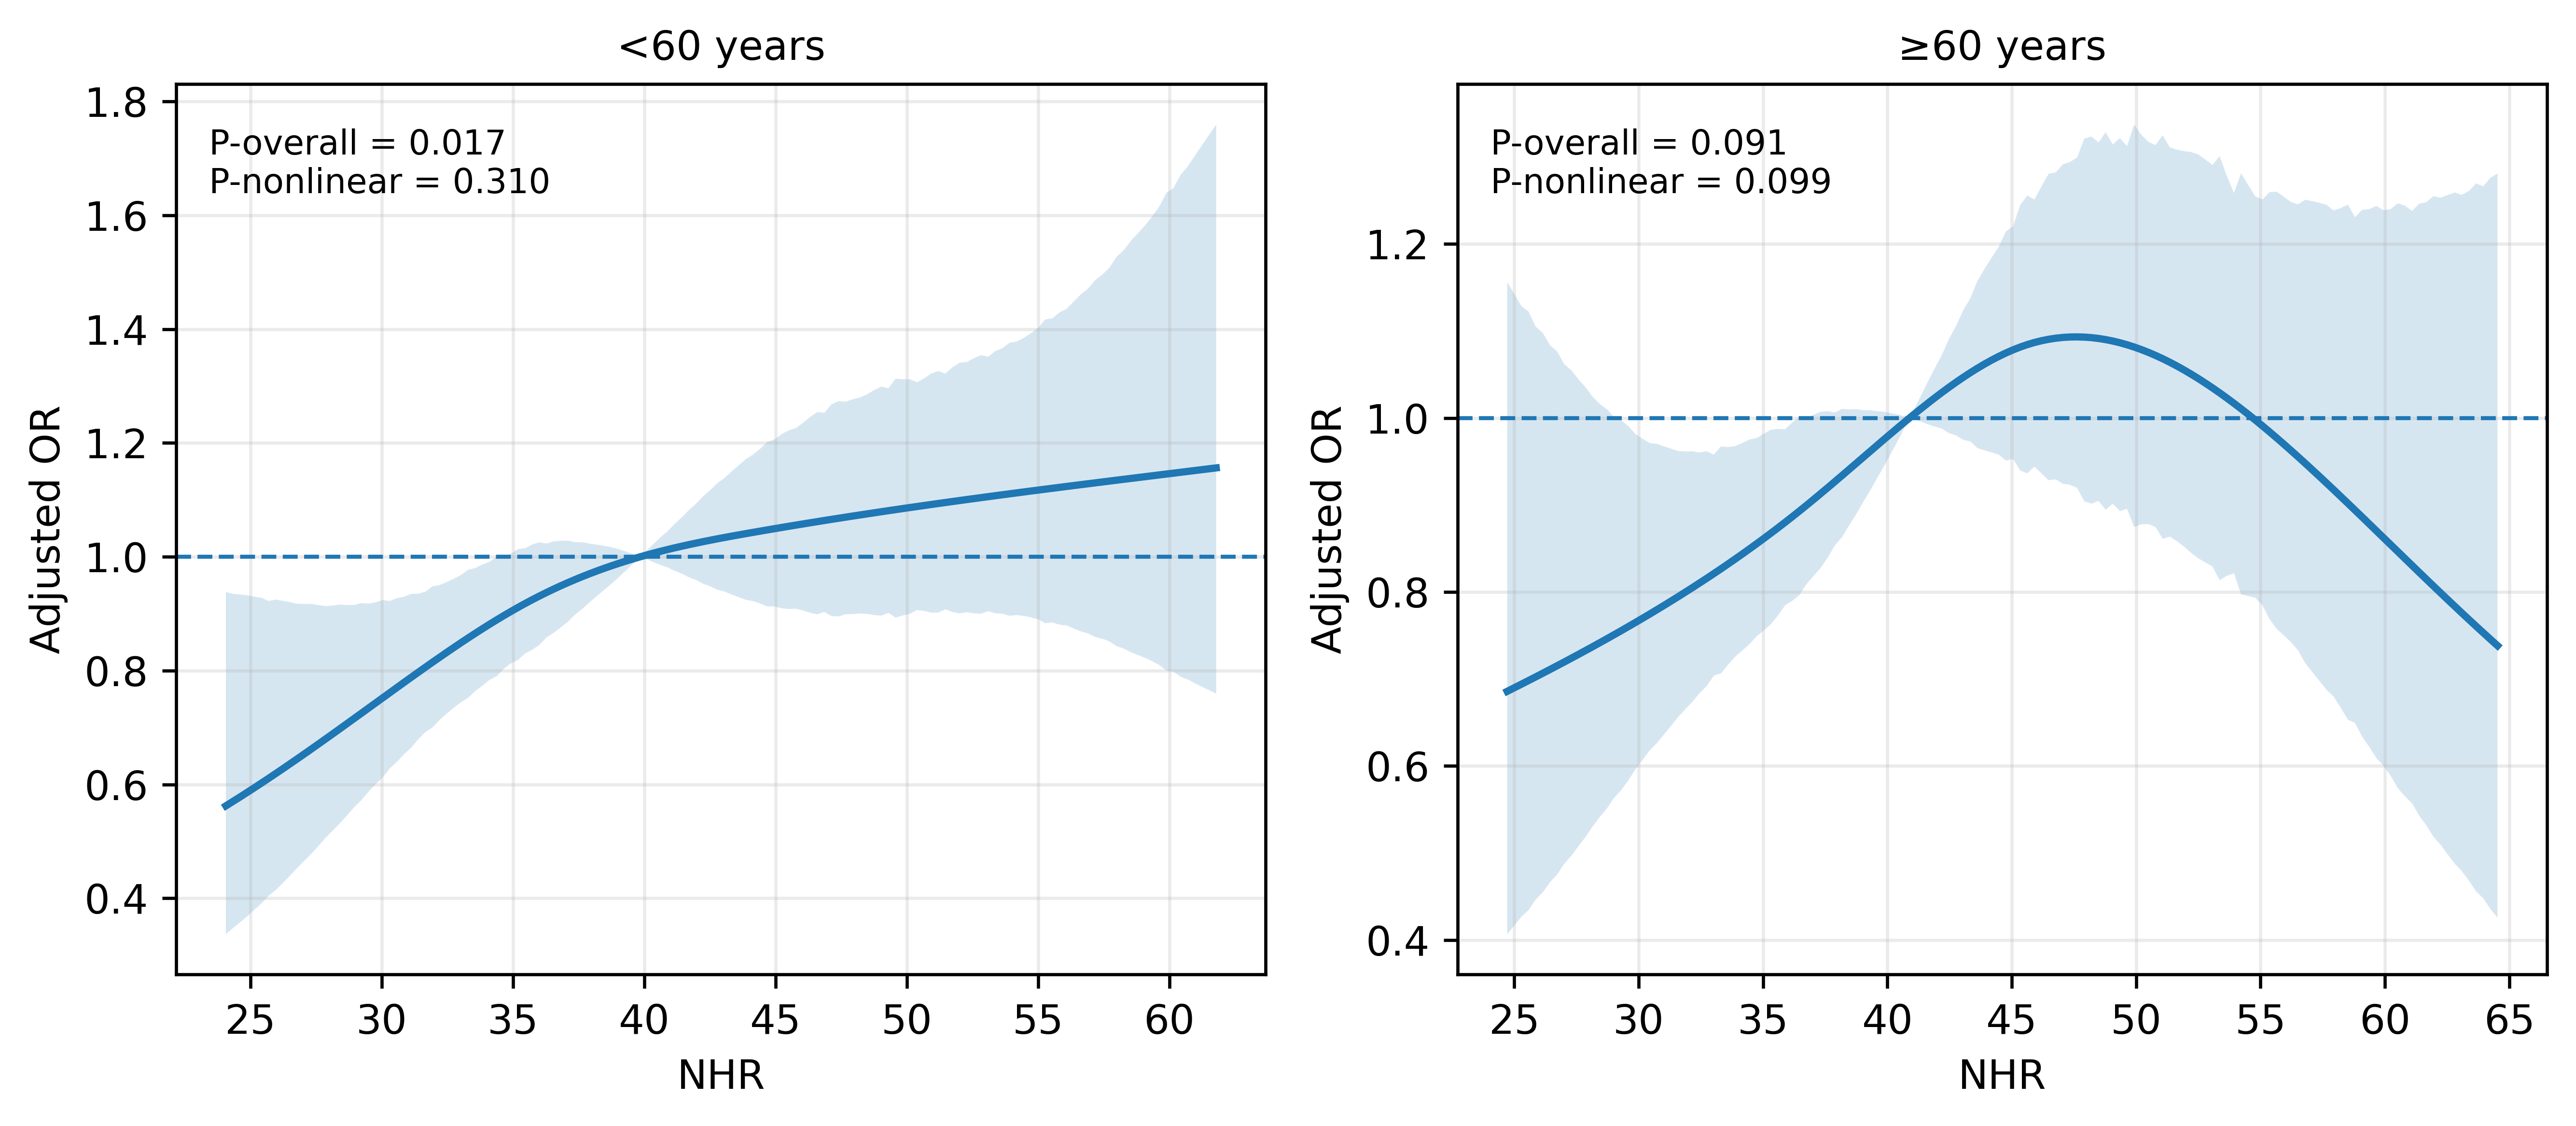


**Supplementary Figure S4. Age-stratified restricted cubic spline analysis of the association between TyG index and hyperuricemia.**


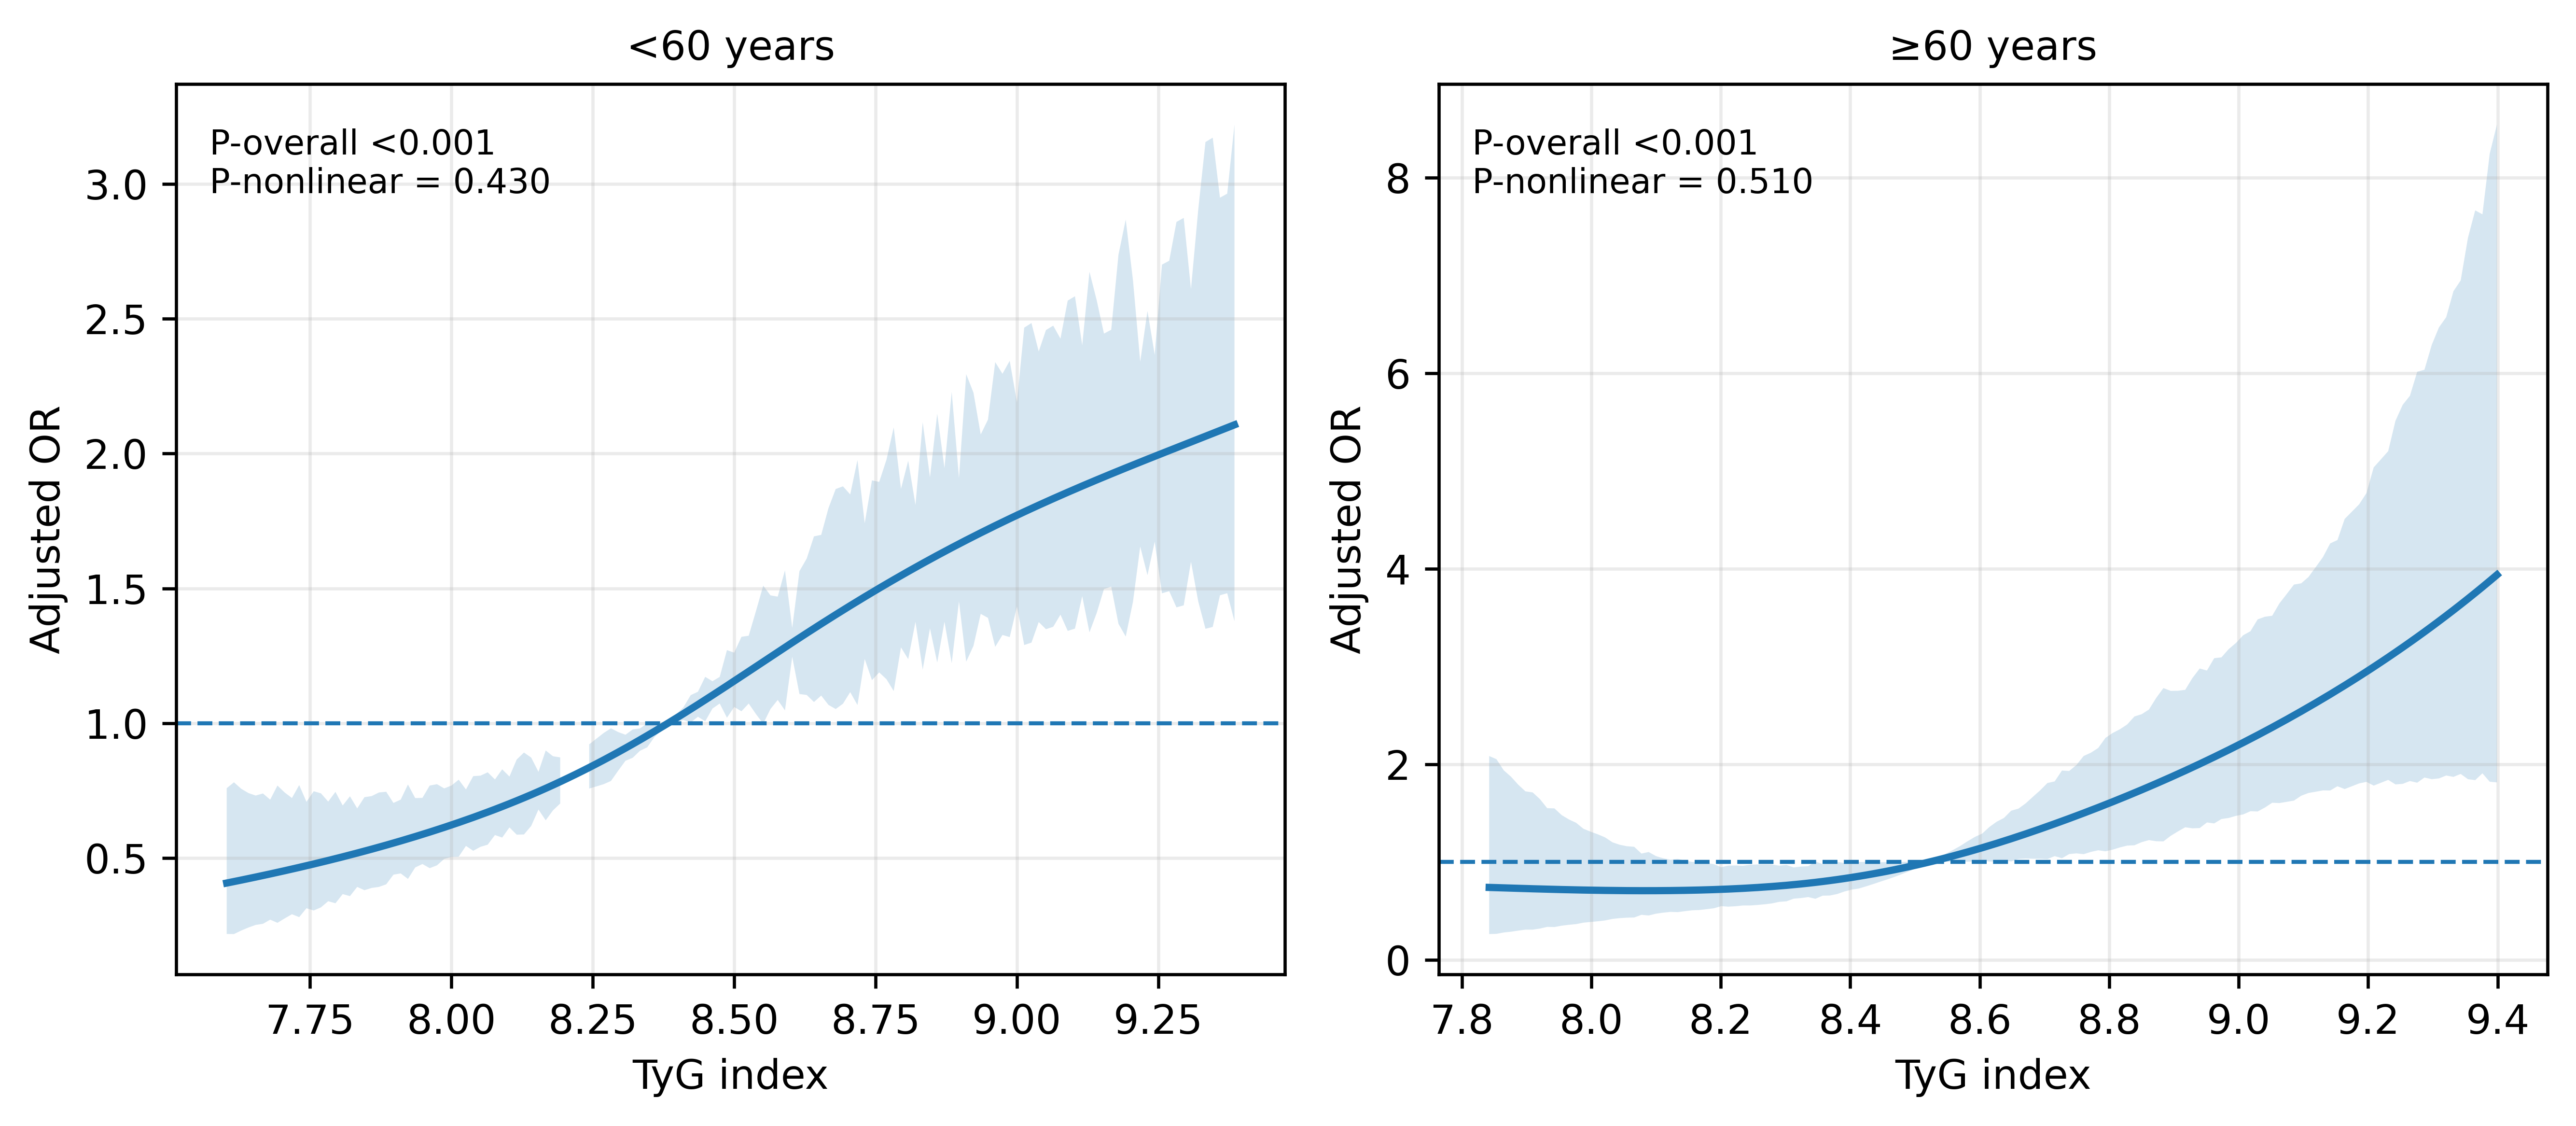


# Supplementary Figure Legends

**Supplementary Figure S1. Sex-stratified restricted cubic spline analysis of the association between NHR and hyperuricemia.**

Restricted cubic spline curves for NHR were fitted separately in men and women. Analyses were conducted in the NHR analysis cohort (n = 7,959). Models were adjusted for age, alanine aminotransferase, aspartate aminotransferase, creatinine, blood urea nitrogen, white blood cell count, hemoglobin, and platelet count.

**Supplementary Figure S2. Sex-stratified restricted cubic spline analysis of the association between TyG index and hyperuricemia.**

Restricted cubic spline curves for TyG were fitted separately in men and women. Analyses were conducted in the metabolic subcohort with complete triglyceride and fasting glucose data (n = 4,193). Models were adjusted for age, alanine aminotransferase, aspartate aminotransferase, creatinine, blood urea nitrogen, white blood cell count, hemoglobin, and platelet count.

**Supplementary Figure S3. Age-stratified restricted cubic spline analysis of the association between NHR and hyperuricemia.**

Restricted cubic spline curves for NHR were fitted separately in participants aged <60 and ≥60 years. Analyses were conducted in the NHR analysis cohort (n = 7,959). Models were adjusted for age, sex, alanine aminotransferase, aspartate aminotransferase, creatinine, blood urea nitrogen, white blood cell count, hemoglobin, and platelet count.

**Supplementary Figure S4. Age-stratified restricted cubic spline analysis of the association between TyG index and hyperuricemia.**

Restricted cubic spline curves for TyG were fitted separately in participants aged <60 and ≥60 years. Analyses were conducted in the metabolic subcohort with complete triglyceride and fasting glucose data (n = 4,193). Models were adjusted for age, sex, alanine aminotransferase, aspartate aminotransferase, creatinine, blood urea nitrogen, white blood cell count, hemoglobin, and platelet count.
